# Supplementary material for: Kinetic-energy-based error quantification in Kohn–Sham density functional theory
Source: Royal Society of Chemistry journal article supplement (doi:10.1039/c9cp04595c), 2019-01-01
Supplement: c9cp04595c2.pdf [file c9cp04595c2.pdf]

# **Supporting Information:**

## **Kinetic-energy-based error quantification in Kohn-Sham density functional theory**

Mohammad Mostafanejad, Jessica Haney, and A. Eugene DePrince III\*

*Department of Chemistry and Biochemistry, Florida State University, Tallahassee, FL  
32306-4390*

E-mail: [adeprince@fsu.edu](mailto:adeprince@fsu.edu)

### **Contents:**

**Table S1** Various density error metrics for molecular systems, including normed integral absolute deviations in densities, density gradients, and density Laplacians; normed absolute errors in non-interacting kinetic energies; and normed deviations in the total energy evaluated using Kohn-Sham and Hartree-Fock densities as inputs to corresponding Kohn-Sham energy functional.
